# Supplementary material
Source: PubMed Central journal article supplement (PMC5592309)
Supplement: YLNQ_A_1360065_SM0250.pdf [file YLNQ_A_1360065_SM0250.pdf]

*Linacre Quarterly* 84 (2017)

Hormonal Contraception and the Development of Autoimmunity  
A Review of the Literature

Supplemental Material

William V. Williams  
BriaCell Therapeutics Corporation, Havertown, PA, USA  
and University of Pennsylvania, Philadelphia, PA, USA

**Table 1. Individual Studies of the Effects of Combined Hormonal Contraceptives on the Development of Rheumatoid Arthritis**

| Study                             | Study Design                         | OR <sup>1</sup><br>Ever Use | RR <sup>2</sup><br>Ever Use | OR<br>Current Use  | RR<br>Current Use | OR<br>Past Use | RR<br>Past Use   | Cases | Controls | Quality<br>Score |
|-----------------------------------|--------------------------------------|-----------------------------|-----------------------------|--------------------|-------------------|----------------|------------------|-------|----------|------------------|
| Hernandez-Avila et al 1990        | Cohort study                         |                             | 0.9<br>(0.6-1.4)            |                    |                   |                | 0.9<br>(0.6-1.3) | 115   | 116,445  | 94%              |
| Pedersen et al 2007 <sup>3</sup>  | Frequency-matched case-control study | 1.1<br>(0.76-1.6)           |                             |                    |                   |                |                  | 366   | 478      | 92%              |
| Brennan and Silman 1994           | Case-control monozygotic twins       |                             | 0.25<br>(0.03-2.24)         |                    |                   |                |                  | 35    | 35       | 90%              |
| Brennan and Silman 1994           | Case-control dizygotic twins         |                             | 0.75<br>(0.17-3.35)         |                    |                   |                |                  | 31    | 31       | 90%              |
| Brennan and Silman 1994           | Case-control population controls     |                             | 0.43<br>(0.17-1.09)         |                    |                   |                |                  | 60    | 160      | 90%              |
| Brennan et al 1997 <sup>4</sup>   | Nested case-control study            | 1.11<br>(0.48-2.54)         |                             | 0.15<br>(0.1-2.3)  |                   |                |                  | 69    | 69       | 90%              |
| Karlson et al 2004 <sup>5</sup>   | Cohort study                         |                             | 1.1<br>(0.9-1.3)            |                    |                   |                |                  | 674   | 110,026  | 90%              |
| Pikwer et al 2009 <sup>6</sup>    | Nested case-control                  | 1.03<br>(0.63 - 1.67)       |                             |                    |                   |                |                  | 136   | 544      | 90%              |
| Hazes et al 1990                  | Case-control in sibs                 |                             | 0.41<br>(0.16-1.09)         |                    |                   |                |                  | 86    | 118      | 89%              |
| del Junco et al 1985              | Population-based case-control study  |                             | 1.1<br>(0.7-1.7)            |                    | 1.3<br>(0.7-2.4)  |                | 1<br>(0.6-1.7)   | 182   | 182      | 88%              |
| Moskowitz et al 1990              | Case-control                         |                             |                             |                    | 2<br>(0.97-4.21)  |                | 1<br>(0.4-2.2)   | 71    | 280      | 88%              |
| Doran et al 2004                  | population based case-control study  | 0.56<br>(0.34 - 0.92)       |                             | 1<br>(0.40-2.52)   |                   |                |                  | 445   | 445      | 88%              |
| Pedersen et al 2006 <sup>7</sup>  | Case-control                         | 1.24<br>(0.91 - 1.71)       |                             | 1<br>(0.57 - 1.76) |                   |                |                  | 366   | 478      | 87%              |
| Pedersen et al 2006 <sup>14</sup> | Case-control ACP+                    | 1.65<br>(1.06 - 2.57)       |                             |                    |                   |                |                  | 209   | 477      | 87%              |
| Pedersen et al 2006 <sup>14</sup> | Case-control ACP-                    | 1.19<br>(0.68 - 2.07)       |                             |                    |                   |                |                  | 103   | 477      | 87%              |
| Spector et al 1990 <sup>8</sup>   | Case-control vs. OA                  | 0.56<br>(0.29-1.12)         |                             |                    |                   |                |                  | 150   | 157      | 85%              |
| Spector et al 1990 <sup>7</sup>   | Case-control vs. population          | 0.6<br>(0.30-1.17)          |                             |                    |                   |                |                  | 150   | 180      | 85%              |

<sup>1</sup> OR = odds ratio

<sup>2</sup> RR = relative risk

<sup>3</sup> The sample size is large enough to detect ORs of 1.5–2 . OR is my calculation. Study population overlap with Pedersen et al 2006.

<sup>4</sup> Rheumatoid arthritis cases only, very few with current OC use. Current use excluded from analyses as only 3 versus 5 cases versus controls.

<sup>5</sup> Notes that breast feeding is protective.

<sup>6</sup> Notes that breast feeding is protective.

<sup>7</sup> Same population as Pedersen 2007. ACP = anti-citrullinated protein antibody.

<sup>8</sup> Only considered oral contraceptive use prior to the age of 35.

| Study                               | Study Design                    | OR <sup>1</sup><br>Ever Use | RR <sup>2</sup><br>Ever Use | OR<br>Current Use   | RR<br>Current Use     | OR<br>Past Use      | RR<br>Past Use        | Cases  | Controls | Quality<br>Score |
|-------------------------------------|---------------------------------|-----------------------------|-----------------------------|---------------------|-----------------------|---------------------|-----------------------|--------|----------|------------------|
| Berglin et al 2010                  | Case-control                    |                             | 0.79<br>(0.45-1.38)         |                     |                       |                     |                       | 70     | 280      | 85%              |
| Merlino et al 2003 <sup>9</sup>     | Prospective cohort              |                             | 1<br>(0.67 – 1.50)          |                     |                       |                     |                       | 158    | 31,178   | 84%              |
| Jorgensen et al 1996 <sup>10</sup>  | Case-control <5 years<br>of use |                             | 0.713<br>(0.41 - 1.23)      |                     |                       |                     |                       | 176    | 145      | 80%              |
| Jorgensen et al 1996 <sup>9</sup>   | Case-control >5 years<br>of use |                             | 0.76<br>(0.5 - 1.14)        |                     |                       |                     |                       |        |          | 80%              |
| Vandenbroucke et al<br>1982         | Case-control                    |                             | 0.42<br>(0.27-0.65)         |                     | 0.45<br>(0.28-0.75)   |                     | 0.4<br>(0.22-0.72)    | 228    | 302      | 79%              |
| Pope et al 1999                     | Case-control                    | 0.6<br>(0.1-3.1)            |                             |                     |                       |                     |                       | 34     | 68       | 79%              |
| Linus et al 1983 <sup>11</sup>      | Case-control                    |                             | 1.7<br>(0.8-3.5)            |                     |                       |                     |                       | 229    | 458      | 78%              |
| Allebeck et al 1984 <sup>12</sup>   | Case-control                    |                             | 0.7<br>(0.40 - 1.24)        |                     |                       |                     |                       | 76     | 152      | 78%              |
| Hannaford et al 1990 <sup>13</sup>  | Prospective cohort<br>study     |                             |                             |                     | 0.82<br>(0.59 - 1.15) |                     | 0.94<br>(0.72 - 1.22) | 23,000 | 23,000   | 78%              |
| Adab et al 2014                     | Cohort <sup>14</sup>            | 1.14<br>(0.91-1.40)         |                             |                     |                       |                     |                       | 669    | 6,654    | 78%              |
| Adab et al 2014                     | Cohort <sup>15</sup>            | 1.18<br>(0.84-1.67)         |                             |                     |                       |                     |                       | 247    | 7,076    | 78%              |
| van Zeben et al 1990 <sup>16</sup>  | Case-control                    |                             | 0.72<br>(0.27-1.89)         |                     |                       |                     |                       | 173    | 378      | 75%              |
| Rodríguez et al 2009                | Cohort study                    |                             |                             | 0.85<br>(0.45-1.60) |                       | 0.81<br>(0.46-1.41) |                       | 579    | 4,234    | 71%              |
| Vessey et al 1987                   | Cohort study                    | 1.12<br>(0.79-1.79)         |                             |                     |                       |                     |                       | 78     | 16,954   | 68%              |
| Darwish and Armenian<br>1987        | Case-control                    | 1.29<br>(0.64-2.58)         |                             |                     |                       |                     |                       | 100    | 100      | 65%              |
| Wingrave and Kay 1978 <sup>17</sup> | Cohort study                    |                             | 0.49<br>(0.28-0.88)         |                     |                       |                     |                       | 94     | 46,000   | 59%              |
| Hazes et al 1989                    | Case-control                    |                             | 0.39                        |                     | 0.58                  |                     |                       | 135    | 378      | 48%              |

<sup>9</sup> Women aged 55-69.

<sup>10</sup> Confounded that OCP use was strongly associated with year of mother's birth and rheumatoid arthritis patients were older.

<sup>11</sup> Overlaps with Del Junco.

<sup>12</sup> Defined those on OCPs for less than a year as non-users.

<sup>13</sup> Results likely skewed by age of current users versus patients.

<sup>14</sup> Physician diagnosis of rheumatoid arthritis or pain/swelling of  $\geq 3$  joints including wrist. Notes that breast feeding is protective.

<sup>15</sup> Physician diagnosis of rheumatoid arthritis or pain/swelling of  $\geq 3$  joints including wrist and  $\geq 1$  ACR definition. Notes that breast feeding is protective.

<sup>16</sup> Overlaps with Hazes 1990 and focuses on severe disease.

<sup>17</sup> Clear skewing in the age of rheumatoid arthritis cases. This study was funded by pharmaceutical companies which sell hormonal contraceptives.

| Study                         | Study Design | OR <sup>1</sup><br>Ever Use | RR <sup>2</sup><br>Ever Use<br>(0.24-0.63) | OR<br>Current Use | RR<br>Current Use<br>(0.32-1.04) | OR<br>Past Use | RR<br>Past Use | Cases | Controls      | Quality<br>Score |
|-------------------------------|--------------|-----------------------------|--------------------------------------------|-------------------|----------------------------------|----------------|----------------|-------|---------------|------------------|
| Hernandez-Avila et al<br>1989 | Cohort study |                             |                                            |                   |                                  |                | 1<br>(0.7-1.3) | 217   | Not<br>stated | 31%              |

**Table 2. Meta-analyses of Studies of the Effects of Combined Hormonal Contraceptives on the Development of Rheumatoid Arthritis**

| Study                     | Study Design                                                  | OR Ever Use         | RR Ever Use         | OR Current Use      | RR Current Use      | OR Past Use         | RR Past Use | Cases           | Controls        | Quality Score |
|---------------------------|---------------------------------------------------------------|---------------------|---------------------|---------------------|---------------------|---------------------|-------------|-----------------|-----------------|---------------|
| Romieu et al 1989         | Meta-analysis case-control studies                            | 0.79<br>(0.58-1.08) |                     | 0.98<br>(0.34-2.77) |                     | 0.73<br>(0.49-1.08) |             | 1447            | 2314            | 90%           |
| Romieu et al 1989         | Meta-analysis Longest duration of use in case-control studies | 0.65<br>(0.39-1.08) |                     |                     |                     |                     |             | NA <sup>1</sup> | NA <sup>1</sup> | 90%           |
| Spector and Hochberg 1990 | Meta-analysis                                                 | 0.73<br>(0.61-0.85) |                     |                     |                     |                     |             | 1634            | 181,841         | 89%           |
| Spector and Hochberg 1990 | Meta-analysis case-control studies                            | 0.6<br>(0.48-0.75)  |                     |                     |                     |                     |             | 1245            | 2028            | 89%           |
| Spector and Hochberg 1990 | Meta-analysis cohort studies                                  | 0.88<br>(0.70-1.12) |                     |                     |                     |                     |             | 389             | 179,813         | 89%           |
| Pladevall-Vila et al 1996 | Meta-analysis                                                 |                     | 0.84<br>(0.66-1.08) |                     | 0.93<br>(0.66-1.32) |                     |             | 1177            | 142,225         | 89%           |
| Pladevall-Vila et al 1996 | Meta-analysis case-control studies                            |                     | 0.73<br>(0.65-0.85) |                     |                     |                     |             | 367             | 31,655          | 89%           |
| Pladevall-Vila et al 1996 | Meta-analysis cohort studies                                  |                     | 0.95<br>(0.81-1.12) |                     |                     |                     |             | 810             | 110,570         | 89%           |
| Pladevall-Vila et al 1996 | Meta-analysis population-based studies                        |                     | 1.11<br>(0.80-1.54) |                     |                     |                     |             | 924             | NA <sup>1</sup> | 89%           |
| Pladevall-Vila et al 1996 | Meta-analysis hospital-based studies                          |                     | 0.71<br>(0.37-1.37) |                     |                     |                     |             | 589             | NA <sup>1</sup> | 89%           |

<sup>1</sup> NA = not available

**Table 3. Individual Studies of the Effects of Combined Hormonal Contraceptives on the Development of Crohn's Disease**

| Study                                    | Study Design  | OR Ever Use         | RR Ever Use           | OR Current Use      | RR Current Use        | OR Past Use        | RR Past Use           | Cases  | Controls | Quality Score |
|------------------------------------------|---------------|---------------------|-----------------------|---------------------|-----------------------|--------------------|-----------------------|--------|----------|---------------|
| Boyko et al 1994                         | Case-control  |                     | 2<br>(1.0-3.7)        |                     |                       |                    |                       | 91     | 169      | 94%           |
| Katschinski 1993 <sup>1</sup>            | Case-control  |                     |                       |                     | 2.5<br>(0.75-4.6)     |                    |                       |        |          | 93%           |
| Katschinski 1993 <sup>2</sup>            | Case-control  |                     |                       |                     | 3.1<br>(1.1-6.7)      |                    |                       |        |          | 93%           |
| Khalili et al 2013 <sup>3</sup>          | Cohort        |                     | 1.43                  |                     | 2.82<br>(1.65 - 4.82) |                    | 1.39<br>(1.05 - 1.85) | 315    | 117,060  | 93%           |
| Cornish et al 2008                       | Meta-analysis |                     |                       |                     | 1.46<br>(1.26-1.70)   |                    | 1.04<br>(0.816-1.340) | 1251   | 74,564   | 91%           |
| Cornish et al 2008 <sup>4</sup>          | Meta-analysis |                     |                       |                     | 1.58<br>(1.07-2.40)   |                    |                       |        |          | 91%           |
| Lashner et al 1989                       | Case-control  | 1<br>(0.46-2.16)    |                       | 0.73<br>(0.34-1.59) |                       | 1.8<br>(0.61-5.29) |                       | 51     | 51       | 88%           |
| García Rodríguez et al 2005 <sup>5</sup> | Cohort        |                     |                       |                     | 1.94<br>(0.85–4.45)   |                    | 1.04<br>(0.50–2.17)   | 171    | 10,000   | 88%           |
| Lesko et al 1985 <sup>6</sup>            | Case-control  |                     | 1.7<br>(1.0-3.2)      |                     |                       |                    |                       | 57     | 2189     | 83%           |
| Godet et al 1995 <sup>7</sup>            | Meta-analysis |                     | 1.44<br>(1.12 - 1.86) |                     |                       |                    |                       | 531    | 49,156   | 82%           |
| Sandler et al 1992                       | Case-control  |                     | 1.49<br>(0.99-2.26)   |                     |                       |                    |                       | 184    | 217      | 81%           |
| Persson et al 1993                       | Case-control  |                     | 1.7<br>(0.9-3.2)      |                     |                       |                    |                       | 152    | 305      | 81%           |
| Halfvarson et al 2006 <sup>8</sup>       | Case-control  |                     |                       |                     | 1.5<br>(0.4–5.3)      |                    |                       | 102    | 102      | 75%           |
| Lowe et al 2009 <sup>9</sup>             | Case-control  |                     | 1.05                  |                     |                       |                    |                       | 21,172 | 754,6131 | 74%           |
| Ng et al 2012 <sup>10</sup>              | Case-control  | 4<br>(1.1–14.2)     |                       |                     |                       |                    |                       | 125    | 125      | 74%           |
| Ng et al 2012 <sup>11</sup>              | Case-control  | 9.04<br>(1.11–73.6) |                       |                     |                       |                    |                       |        |          | 74%           |

<sup>1</sup> Adjusted RR for 1-3 years prior to disease onset.<sup>2</sup> Adjusted RR for >3 years prior to disease onset.<sup>3</sup> Hazard ratios (RR adjusted for time).<sup>4</sup> High quality studies.<sup>5</sup> OR increased with duration of use.<sup>6</sup> RR is from multiple logistic regression analysis.<sup>7</sup> Adjusted for smoking.<sup>8</sup> Monozygotic and dizygotic twins.<sup>9</sup> Adjusted incidence rate ratio.<sup>10</sup> Twins study.<sup>11</sup> Multivariate analysis.

| Study                            | Study Design          | OR Ever Use          | RR Ever Use           | OR Current Use    | RR Current Use | OR Past Use      | RR Past Use | Cases | Controls | Quality Score |
|----------------------------------|-----------------------|----------------------|-----------------------|-------------------|----------------|------------------|-------------|-------|----------|---------------|
| Sicilia et al 2001               | Case-control          | 2.8<br>(1.01 – 7.77) |                       |                   |                |                  |             | 103   | 103      | 71%           |
| Corrao et al 1998                | Case-control ever use |                      |                       | 3.4<br>(1.0-11.9) |                | 1.8<br>(0.4-7.3) |             | 225   | 225      | 67%           |
| Katschinski 1993 <sup>12</sup>   | Case-control          |                      | 4.3<br>(1.3-14.4)     |                   |                |                  |             | 83    | 83       | 57%           |
| Logan and Kay 1989               | Cohort                |                      | 1.7<br>(0.88 – 3.2)   |                   |                |                  |             | 42    | 45,958   | 54%           |
| Han et al 2010                   | Case-control          |                      | 0.66<br>(0.38 - 1.15) |                   |                |                  |             | 315   | 536      | 52%           |
| Vessey et al 1986 <sup>13</sup>  | Cohort                |                      |                       |                   | 1.33           |                  |             | 18    | 17,014   | 46%           |
| Calkins et al 1986 <sup>14</sup> | Case-control          | 1.14<br>(0.44-2.96)  |                       |                   |                |                  |             | 66    | 67       | 42%           |
| Calkins et al 1986 <sup>15</sup> | Case-control          | 1.6<br>(0.59-4.37)   |                       |                   |                |                  |             | 66    | 71       | 42%           |
| Vcev et al 2015                  | Case-Control          | 0.28<br>(0.03-2.46)  |                       |                   |                |                  |             | 11    | 42       | 31%           |

<sup>12</sup> RR for use >3 years.

<sup>13</sup> Authors calculation, adjusted for smoking.

<sup>14</sup> Hospital controls.

<sup>15</sup> Neighborhood controls.

**Table 4. Individual Studies of the Effects of Combined Hormonal Contraceptives on the Development of Ulcerative Colitis**

| Study                              | Study Design  | OR Ever Use         | RR Ever Use           | OR Current Use     | RR Current Use        | OR Past Use         | RR Past Use           | Cases | Controls | Quality Score |
|------------------------------------|---------------|---------------------|-----------------------|--------------------|-----------------------|---------------------|-----------------------|-------|----------|---------------|
| Boyko et al 1994                   | Case-control  |                     | 1.7<br>(1.1-2.7)      |                    |                       |                     |                       | 211   | 341      | 94%           |
| Khalili et al 2013 <sup>1</sup>    | Cohort        |                     | 1.18<br>(0.92 - 1.52) |                    | 1.22<br>(0.74 - 2.07) |                     | 1.18<br>(0.91 - 1.52) | 392   | 116,983  | 93%           |
| Cornish et al 2008                 | Meta-analysis |                     |                       |                    | 1.28<br>(1.06-1.54)   |                     | 1.07<br>(0.702-1.640) | 883   | 74,932   | 91%           |
| Cornish et al 2008 <sup>2</sup>    | Meta-analysis |                     |                       |                    | 1.24<br>(0.999-1.54)  |                     |                       |       |          | 91%           |
| García Rodríguez et al 2005        | Cohort        |                     |                       |                    | 1.58<br>(0.71–3.52)   |                     | 0.67<br>(0.32–1.39)   | 222   | 10,000   | 88%           |
| Godet et al 1995 <sup>3</sup>      | Meta-analysis |                     | 1.29<br>(0.94 - 1.77) |                    |                       |                     |                       | 851   | 49,875   | 82%           |
| Lashner et al 1990                 | Case-control  | 0.86<br>(0.40-1.85) |                       | 0.7<br>(0.27-1.83) |                       | 1.14<br>(0.41-3.15) |                       | 46    | 46       | 81%           |
| Sandler et al 1992 <sup>4</sup>    | Case-control  |                     | 1.1<br>(0.65-1.85)    |                    |                       |                     |                       | 89    | 217      | 81%           |
| Persson et al 1993                 | Case-control  |                     | 1.7<br>(0.8-3.3)      |                    |                       |                     |                       | 145   | 305      | 81%           |
| Halfvarson et al 2006 <sup>5</sup> | Case-control  |                     |                       |                    | 0.6<br>(0.1–2.5)      |                     |                       | 125   | 125      | 75%           |
| Ng et al 2012 <sup>6</sup>         | Case-control  | 0.43<br>(0.11-1.66) |                       |                    |                       |                     |                       | 125   | 125      | 74%           |
| Parrello et al 1997 <sup>7</sup>   | Case-control  | 3.11<br>(1.54-6.3)  |                       |                    |                       |                     |                       | 536   | 755      | 67%           |
| Corrao et al 1998                  | Case-control  |                     |                       | 1.6<br>(0.9-3.0)   |                       | 1.3<br>(0.6-2.8)    |                       | 594   | 594      | 67%           |
| Logan and Kay 1989                 | Cohort        |                     | 1.3<br>(0.82-2.0)     |                    |                       |                     |                       | 78    | 45,922   | 54%           |
| Vessey et al 1986 <sup>8</sup>     | Cohort        |                     |                       |                    | 2.1                   |                     |                       | 31    | 17,001   | 46%           |
| Calkins et al 1986 <sup>9</sup>    | Case-control  | 0.62<br>(0.11-3.42) |                       |                    |                       |                     |                       | 35    | 32       | 42%           |

<sup>1</sup> Hazard ratios (RR adjusted for time).

<sup>2</sup> High quality studies.

<sup>3</sup> Adjusted for smoking.

<sup>4</sup> Interaction with smoking notes, higher RR in smokers (2.49).

<sup>5</sup> Monozygotic and dizygotic twins.

<sup>6</sup> Twins studies.

<sup>7</sup> Unclear how the calculation was done.

<sup>8</sup> Authors calculation, adjusted for smoking.

<sup>9</sup> Hospital controls.



| Study                            | Study Design | OR Ever Use           | RR Ever Use | OR Current Use | RR Current Use | OR Past Use | RR Past Use | Cases | Controls | Quality Score |
|----------------------------------|--------------|-----------------------|-------------|----------------|----------------|-------------|-------------|-------|----------|---------------|
| Calkins et al 1986 <sup>10</sup> | Case-control | 0.57<br>(0.11-2.88)   |             |                |                |             |             | 35    | 38       | 42%           |
| Vcev et al 2015                  | Case-Control | 0.75<br>(0.30 - 1.88) |             |                |                |             |             | 62    | 42       | 31%           |

---

<sup>10</sup> Neighborhood controls.

**Table 5. Individual Studies of the Effects of Combined Hormonal Contraceptives on the Development of Systemic Lupus Erythematosus**

| Study                                    | Study Design | OR Ever Use       | RR Ever Use         | OR Current Use    | RR Current Use      | OR Past Use      | RR Past Use         | Cases | Controls | Quality Score |
|------------------------------------------|--------------|-------------------|---------------------|-------------------|---------------------|------------------|---------------------|-------|----------|---------------|
| Costenbader et al 2007 <sup>1</sup>      | Cohort       |                   | 1.5<br>(1.1-2.1)    |                   |                     |                  | 1.7<br>(1.2-2.3)    | 262   | 238,046  | 96%           |
| Costenbader et al 2007 <sup>2</sup>      | Cohort       |                   | 1.6<br>(1.1-2.2)    |                   |                     |                  | 1.6<br>(1.1-2.2)    | 164   | 102,882  | 96%           |
| Costenbader et al 2007 <sup>3</sup>      | Cohort       |                   | 2.3<br>(1.0-5.0)    |                   |                     |                  | 2.3<br>(1.1-5.2)    | 98    | 107,854  | 96%           |
| Bernier et al 2009                       | Cohort       |                   | 1.19<br>(0.98-1.45) |                   | 1.54<br>(1.15-2.07) |                  | 1.06<br>(0.85-1.33) | 786   | 7817     | 96%           |
| Bernier et al 2009 <sup>4</sup>          | Cohort       |                   |                     |                   | 2.52<br>(1.14-5.57) |                  |                     | 786   | 7817     | 96%           |
| Bernier et al 2009 <sup>5</sup>          | Cohort       |                   |                     |                   | 1.45<br>(1.06-1.99) |                  |                     | 786   | 7817     | 96%           |
| Cooper et al 2002                        | Case-control |                   |                     | 1.5<br>(0.8-2.7)  |                     | 1.3<br>(0.8-2.0) |                     | 240   | 321      | 92%           |
| Sanchez-Guerrero et al 1997              | Cohort       |                   | 1.4<br>(0.9-2.1)    |                   |                     |                  |                     | 99    | 121,546  | 88%           |
| Sanchez-Guerrero et al 1997 <sup>6</sup> | Cohort       |                   | 1.9<br>(1.1-3.3)    |                   |                     |                  |                     | 58    | 121,587  | 88%           |
| Strom et al 1994                         | Case-control | 0.8<br>(0.5-1.4)  |                     |                   |                     |                  |                     | 195   | 143      | 73%           |
| Zonana-Nacach et al 2002 <sup>7</sup>    | Case-control | 2.1<br>(1.18-3.6) |                     |                   |                     |                  |                     | 130   | 130      | 61%           |
| Grimes et al 1985                        | Case-control |                   |                     | 0.5<br>(0.11-2.3) |                     |                  |                     | 109   | 109      | 58%           |

<sup>1</sup> Pooled RR from the Nurses' Health Study (NHS) and NHS II.

<sup>2</sup> RR from the NHS (data collection through 1976).

<sup>3</sup> RR from NHS II (data collection through 1989).

<sup>4</sup> RR for short term use (starting cHCs within ≤3 months).

<sup>5</sup> RR for long term use (starting cHCs over 3 months previously with current use ongoing).

<sup>6</sup> Using most stringent definition of systemic lupus erythematosus.

<sup>7</sup> Paper written in Spanish. OR is for use of oral contraceptives for more than one year.

**Table 6. Individual Studies of the Effects of Combined Hormonal Contraceptives on the Development of Multiple Sclerosis**

| Study                             | Study Design | OR Ever Use         | RR Ever Use      | OR Current Use    | RR Current Use   | OR Past Use         | RR Past Use      | Cases | Controls | Quality Score |
|-----------------------------------|--------------|---------------------|------------------|-------------------|------------------|---------------------|------------------|-------|----------|---------------|
| Hellwig et al 2016                | Case-control | 1.51<br>(1.12-2.03) |                  | 1.47<br>1.05-2.05 |                  | 1.55<br>(1.20-2.00) |                  | 400   | 3804     | 92%           |
| Hernán et al 2000 <sup>1</sup>    | Cohort       |                     | 1.1<br>(0.9-1.5) |                   | 1<br>(0.6-1.6)   |                     | 1.2<br>(0.9-1.5) | 313   | 237,318  | 90%           |
| Kotzamani et al 2012              | Case-control | 1.6<br>(1.1-2.4)    |                  |                   |                  |                     |                  | 254   | 314      | 81%           |
| Alonso et al 2005 <sup>2</sup>    | Case-control | 0.6<br>(0.4-1.0)    |                  | 0.5<br>(0.3-1.2)  |                  | 0.6<br>(0.4-1.0)    |                  | 106   | 1001     | 77%           |
| Thorogood et al 1998 <sup>3</sup> | Cohort       |                     |                  |                   | 1.2<br>(0.7-2.0) |                     | 1.3<br>(0.9-2.0) | 114   | 46,000   | 75%           |
| Villard-Mackintosh et al 1993     | Cohort       |                     | 0.8<br>(0.5-1.4) |                   |                  |                     |                  | 63    | 16,969   | 65%           |

<sup>1</sup> NHS I and II cohorts.

<sup>2</sup> OC use over the 3 years prior to the index date. Limited to women ≤50 years of age.

<sup>3</sup> Funded by drug companies that make HCs.

**Table 7. Individual Studies of the Effects of Combined Hormonal Contraceptives on the Development of Thyroid Disease**

| Study                                   | Study Design | OR Ever Use         | RR Ever Use             | OR Current Use | RR Current Use         | OR Past Use | RR Past Use | Cases | Controls | Quality Score |
|-----------------------------------------|--------------|---------------------|-------------------------|----------------|------------------------|-------------|-------------|-------|----------|---------------|
| Hyperthyroidism (Grave's Disease)       |              |                     |                         |                |                        |             |             |       |          |               |
| Vestergaard et al 2002                  | Case-control | 0.68<br>(0.49-0.93) |                         |                |                        |             |             | 621   | 621      | 88%           |
| Strieder et al 2003 <sup>1</sup>        | Case-control |                     | 0.169<br>(0.055-0.523)  |                | 0.356<br>(0.073-1.726) |             |             | 15    | 759      | 70%           |
| Frank and Kay 1978                      | Cohort       |                     |                         |                | 0.71                   |             | 0.9         | 53    | 46,000   | 41%           |
| Hypothyroidism (Autoimmune Thyroiditis) |              |                     |                         |                |                        |             |             |       |          |               |
| Vestergaard et al 2002                  | Case-control | 0.86<br>(0.64-1.16) |                         |                |                        |             |             | 411   | 411      | 88%           |
| Strieder et al 2003 <sup>1</sup>        | Case-control |                     | 4.232<br>(0.552-32.425) |                | 0.889<br>(0.375-2.104) |             |             | 29    | 759      | 70%           |
| Frank and Kay 1978                      | Cohort       |                     | 1.17                    |                |                        |             |             | 26    | 46,000   | 41%           |

<sup>1</sup> Estrogen use not separated into hormone replacement therapy versus cHCs.

**Table 8. Individual Studies of the Effects of Combined Hormonal Contraceptives on the Development of Dermatologic Conditions**

| Study                            | Study Design | OR Ever Use                   | RR Ever Use          | OR Current Use | RR Current Use   | OR Past Use | RR Past Use      | Cases | Controls | Quality Score |
|----------------------------------|--------------|-------------------------------|----------------------|----------------|------------------|-------------|------------------|-------|----------|---------------|
| Eczema                           |              |                               |                      |                |                  |             |                  |       |          |               |
| Vessey et al 2000                | Cohort       |                               | 1.3<br>(1.0-1.6)     |                | 1.6<br>(1.2-2.1) |             | 1<br>(0.8-1.4)   | 327   | 16,705   | 90%           |
| Psoriasis                        |              |                               |                      |                |                  |             |                  |       |          |               |
| Vessey et al 2000                | Cohort       |                               | 1.5<br>(1.0-2.4)     |                | 1.7<br>(1.0-2.9) |             | 1.4<br>(0.8-2.4) | 92    | 16,940   | 90%           |
| Pemphigus                        |              |                               |                      |                |                  |             |                  |       |          |               |
| Valikhani et al 2007             | Case-control | 1.78<br>(1.01-3.22)           |                      |                |                  |             |                  | 210   | 205      | 53%           |
| Scleroderma                      |              |                               |                      |                |                  |             |                  |       |          |               |
| Pisa et al 2002 <sup>1</sup>     | Case-control | 1.2 <sup>1</sup><br>(0.5-3.2) |                      |                |                  |             |                  | 46    | 153      | 76%           |
| Vulval Lichen Sclerosis          |              |                               |                      |                |                  |             |                  |       |          |               |
| Higgins and Cruickshank 2012     | Case-control |                               | 0.7<br>(0.30 – 1.62) |                |                  |             |                  | 92    | 66       | 61%           |
| Günthert et al 2008 <sup>2</sup> | Case-control | 2.53<br>(1.12-5.75)           |                      |                |                  |             |                  | 40    | 110      | 58%           |

<sup>1</sup> Use of OCs was the referent so the OR in the normal manner is 0.8.

<sup>2</sup> Analysis limited to oral contraceptives (OCs) with anti-androgenic activity. OR for all OCs infinity.

**Table 9. Individual Studies of the Effects of Progesterone-Only Contraceptives on the Development of Autoimmune Diseases and Related Conditions**

| Study                                                     | Study Design | OR Ever Use           | RR Ever Use           | OR Current Use | RR Current Use | OR Past Use | RR Past Use | Cases | Controls | Quality Score |
|-----------------------------------------------------------|--------------|-----------------------|-----------------------|----------------|----------------|-------------|-------------|-------|----------|---------------|
| Dorsopathies                                              |              |                       |                       |                |                |             |             |       |          |               |
| International Collaborative 2001                          | Cohort       | 1.23<br>(0.99-1.53)   |                       |                |                |             |             | 332   | 16,012   | 96%           |
| Rheumatism Excluding the Back                             |              |                       |                       |                |                |             |             |       |          |               |
| International Collaborative 2001                          | Cohort       | 4.71<br>(2.93 - 7.56) |                       |                |                |             |             | 114   | 15,907   | 96%           |
| Arthropathies and Related Disorders                       |              |                       |                       |                |                |             |             |       |          |               |
| International Collaborative 2001                          | Cohort       | 2.6<br>(1.34-5.05)    |                       |                |                |             |             | 44    | 15,977   | 96%           |
| Osteopathies/chondropathies/acquired muscular deformities |              |                       |                       |                |                |             |             |       |          |               |
| International Collaborative 2001                          | Cohort       | 1.69<br>(0.87-3.27)   |                       |                |                |             |             | 38    | 15,983   | 96%           |
| Rheumatoid Arthritis                                      |              |                       |                       |                |                |             |             |       |          |               |
| International Collaborative 2001                          | Cohort       | 3.46<br>(0.72-16.6)   |                       |                |                |             |             | 9     | 8044     | 96%           |
| Eczema, contact dermatitis                                |              |                       |                       |                |                |             |             |       |          |               |
| International Collaborative 2001                          | Cohort       | 3.53<br>(1.97-6.32)   |                       |                |                |             |             | 62    | 15,959   | 96%           |
| Pruritis and related conditions                           |              |                       |                       |                |                |             |             |       |          |               |
| International Collaborative 2001                          | Cohort       | 2.21<br>(1.37-3.55)   |                       |                |                |             |             | 75    | 15,946   | 96%           |
| Alopecia                                                  |              |                       |                       |                |                |             |             |       |          |               |
| International Collaborative 2001                          | Cohort       | 12.44<br>(1.60-96.6)  |                       |                |                |             |             | 12    | 16,009   | 96%           |
| Acne                                                      |              |                       |                       |                |                |             |             |       |          |               |
| International Collaborative 2001                          | Cohort       | 7.48<br>(2.90-19.3)   |                       |                |                |             |             | 35    | 15,986   | 96%           |
| Urticaria                                                 |              |                       |                       |                |                |             |             |       |          |               |
| International Collaborative 2001                          | Cohort       | 3.07<br>(1.21-7.81)   |                       |                |                |             |             | 23    | 15,998   | 96%           |
| Vulval Lichen Sclerosus                                   |              |                       |                       |                |                |             |             |       |          |               |
| Higgins and Cruickshank 2012                              | Case-control |                       | 0.19<br>(0.03 – 0.96) |                |                |             |             | 92    | 66       | 61%           |

## **References**

- Adab P, CQ Jiang, E Rankin, YW Tsang, TH Lam, J Barlow, GN Thomas, WS Zhang, and KK Cheng. 2014. Breastfeeding practice, oral contraceptive use and risk of rheumatoid arthritis among Chinese women: the Guangzhou Biobank Cohort Study. *Rheumatology (Oxford)* 53: 860-66. doi: 10.1093/rheumatology/ket456. Epub 2014 Jan 6.
- Allebeck, P., A. Ahlbom, K., and E. Allander. 1984. Do oral contraceptives reduce the incidence of rheumatoid arthritis? A pilot study using the Stockholm County medical information system. *Scandinavian Journal of Rheumatology* 13: 140-46.
- Alonso, A., S.S. Jick, M.J. Olek, A. Ascherio, H. Jick, and M.A. Hernán. 2005. Recent use of oral contraceptives and the risk of multiple sclerosis. *Archives of Neurology* 62: 1362-65.
- Bernier, M.O., Y. Mikaeloff, M. Hudson, and S. Suissa. 2009. Combined oral contraceptive use and the risk of systemic lupus erythematosus. *Arthritis and Rheumatism* 61: 476-81.
- Berglin, E., H. Kokkonen, E. Einarsdottir, A. Agren, and S. Rantapää Dahlqvist. 2010. Influence of female hormonal factors, in relation to autoantibodies and genetic markers, on the development of rheumatoid arthritis in northern Sweden: a case-control study. *Scandinavian Journal of Rheumatology* 39: 454-60.
- Brennan, P., and A.J. Silman. *American Journal of Epidemiology* 1994. An investigation of gene-environment interaction in the etiology of rheumatoid arthritis. 140: 453-60.
- Brennan, P., C. Bankhead, A. Silman, and D. Symmons. 1997. Oral contraceptives and rheumatoid arthritis: results from a primary care-based incident case-control study. *Seminars in Arthritis and Rheumatism* 26: 817-23.
- Boyko, E.J., M.K. Theis, T.L. Vaughan, and B. Nicol-Blades. 1994. Increased risk of inflammatory bowel disease associated with oral contraceptive use. *American Journal of Epidemiology* 140: 268-78.
- Calkins, B.M., A.I. Mendeloff, and C. Garland. 1986. Inflammatory bowel disease in oral contraceptive users. *Gastroenterology* 91: 523-24.
- Cooper, G.S., M.A. Dooley, E.L. Treadwell, E.W. St Clair, and G.S. Gilkeson. 2002. Hormonal and reproductive risk factors for development of systemic lupus erythematosus: results of a population-based, case-control study. *Arthritis and Rheumatism* 46: 1830-39.
- Cornish, J.A., E. Tan, C. Simillis, S.K. Clark, J. Teare, and P.P. Tekkis. 2008. The risk of oral contraceptives in the etiology of inflammatory bowel disease: a meta-analysis. *American Journal of Gastroenterology* 103: 2394-400.
- Corrao, G., A. Tragnone, R. Caprilli, G. Trallori, C. Papi, A. Andreoli, M. Di Paolo, G. Riegler, G.P. Rigo, O. Ferraù, C. Mansi, M. Ingrosso, and D. Valpiani. 1998. Risk of inflammatory bowel disease attributable to smoking, oral contraception and breastfeeding in Italy: a nationwide case-

control study. Cooperative Investigators of the Italian Group for the Study of the Colon and the Rectum (GISC). *International Journal of Epidemiology* 27: 397-404.

Costenbader, K.H., D. Feskanich, M.J. Stampfer, and E.W. Karlson. 2007. Reproductive and menopausal factors and risk of systemic lupus erythematosus in women. *Arthritis and Rheumatism* 56: 1251-62.

Darwish, M.J., and H.K. Armenian. 1987. A case-control study of rheumatoid arthritis in Lebanon. *International Journal of Epidemiology* 16: 420-24.

del Junco, D.J., J.F. Annegers, H.S. Luthra, C.B. Coulam, and L.T. Kurland. 1985. Do oral contraceptives prevent rheumatoid arthritis? *Journal of the American Medical Association* 254: 1938-41.

Doran, M.F., C.S. Crowson, W.M. O'Fallon, and S.E. Gabriel. 2004. The effect of oral contraceptives and estrogen replacement therapy on the risk of rheumatoid arthritis: a population based study. *Journal of Rheumatology* 31: 207-13.

Frank, P., and C.R. Kay. 1978. Incidence of thyroid disease associated with oral contraceptives. *British Medical Journal* 2: 1531.

García Rodríguez, L.A., A. González-Pérez, S. Johansson, and M.A. Wallander. 2005. Risk factors for inflammatory bowel disease in the general population. *Alimentary Pharmacology & Therapeutics* 22: 309-15.

Godet, P.G., G.R. May, and L.R. Sutherland. 1995. Meta-analysis of the role of oral contraceptive agents in inflammatory bowel disease. *Gut* 37: 668-73.

Grimes, D.A., S.A. LeBolt, K.R. Grimes, and P.A. Wingo. 1985. Systemic lupus erythematosus and reproductive function: A case control study. *American Journal of Obstetrics and Gynecology* 153: 179-86.

Günthert, A.R., M. Faber, G. Knappe, S. Hellriegel, and G. Emons. 2008. Early onset vulvar Lichen Sclerosus in premenopausal women and oral contraceptives. *European Journal of Obstetrics Gynecology and Reproductive Biology* 137: 56-60. Epub 2007 Dec 4.

Halfvarson, J., T. Jess, A. Magnuson, S.M. Montgomery, M. Orholm, C. Tysk, V. Binder, and G. Järnerot. 2006. Environmental factors in inflammatory bowel disease: a co-twin control study of a Swedish-Danish twin population. *Inflammatory Bowel Disease* 12: 925-33.

Han, D.Y., A.G. Fraser, P. Dryland, and L.R. Ferguson. 2010. Environmental factors in the development of chronic inflammation: a case-control study on risk factors for Crohn's disease within New Zealand. *Mutation Research* 690: 116-22.

Hannaford, P.C., C.R. Kay, and S. Hirsch. 1990. Oral contraceptives and rheumatoid arthritis: new data from the Royal College of General Practitioners' oral contraception study. *Annals of the Rheumatic Diseases* 49: 744-46.



- Hazes, J.M., B.A. Dijkmans, J.P. Vandenbroucke, R.R. De Vries, and A. Cats. 1989. Oral contraceptives and rheumatoid arthritis; further evidence for a protective effect independent of duration of pill use. *British Journal of Rheumatology* 28 Suppl 1: 34; discussion 42-45.
- Hazes, J.M., A.J. Silman, R. Brand, T.D. Spector, D.J. Walker, and J.P. Vandenbroucke. 1990. Influence of oral contraception on the occurrence of rheumatoid arthritis in female sibs. *Scandinavian Journal of Rheumatology* 19: 306-10.
- Hellwig, K., Chen, L.H., Stanczyk, F.Z., Langer-Gould, A.M. 2016. Oral Contraceptives and Multiple Sclerosis/Clinically Isolated Syndrome Susceptibility. *PLoS One*. 11:e0149094. doi: 10.1371/journal.pone.0149094.
- Hernán, M.A., M.J. Hohol, M.J. Olek, D. Spiegelman, and A. Ascherio. 2000. Oral contraceptives and the incidence of multiple sclerosis. *Neurology* 55: 848-54.
- Hernandez-Avila M, M.H. Liang, W.C. Willett, M.J. Stampfer, G.A. Colditz, B. Rosner, R.W. Chang, C.H. Hennekens, and F.E. Speizer. 1990. Exogenous sex hormones and the risk of rheumatoid arthritis. *Arthritis and Rheumatism* 33: 947-53.
- Hernandez-Avila, M., Liang MH, Willett WC, Stampfer MJ, Colditz GA, Rosner B, Chang RW, Hennekens CH, Speizer FE. 1989. Oral contraceptives, replacement oestrogens and the risk of rheumatoid arthritis. *British Journal of Rheumatology* 28 Suppl 1:31; discussion 42-45.
- Higgins, C.A., and M.E. Cruickshank. 2012. A population-based case-control study of aetiological factors associated with vulval lichen sclerosus. *Journal of Obstetrics and Gynaecology* 32: 271-15. doi: 10.3109/01443615.2011.649320.
- International Collaborative Post-Marketing Surveillance of Norplant. Corresponding authors: Farley, T.M.M. and I. Sivin. 2001. Post-marketing surveillance of Norplant contraceptive implants: II. non-reproductive health. *Contraception* 63: 187-20.
- Jorgensen, C., M.C. Picot, C. Bologna, and J. Sany. 1996. Oral contraception, parity, breast feeding, and severity of rheumatoid arthritis. *Annals of the Rheumatic Diseases* 55: 94-98.
- Katschinski, B. 1993. [Smoking and ovulation inhibitor in inflammatory bowel diseases]. *Medizinische Klinik (Munich, Germany)* 88 Suppl 1: 5-8.
- Karlson, E.W., L.A. Mandl, S.E. Hankinson, and F. Grodstein. 2004. Do breast-feeding and other reproductive factors influence future risk of rheumatoid arthritis? Results from the Nurses' Health Study. *Arthritis and Rheumatism* 50: 3458-67.
- Khalili, H., L.M. Higuchi, A.N. Ananthakrishnan, J.M. Richter, D. Feskanich, C.S. Fuchs, and A.T. Chan. 2013. Oral contraceptives, reproductive factors and risk of inflammatory bowel disease. *Gut* 62: 1153-59.
- Kotzamani, D., T. Panou, V. Mastorodemos, M. Tzagournissakis, H. Nikolakaki, C. Spanaki, and A. Plaitakis. 2012. Rising incidence of multiple sclerosis in females associated with urbanization. *Neurology* 78: 1728-35.

- Lashner, B.A., S.V. Kane, and S.B. Hanauer. 1989. Lack of association between oral contraceptive use and Crohn's disease: a community-based matched case-control study. *Gastroenterology* 97: 1442-47.
- Lashner, B.A., S.V. Kane, and S.B. Hanauer. 1990. Lack of association between oral contraceptive use and ulcerative colitis. *Gastroenterology* 99: 1032-36.
- Lesko, S.M., D.W. Kaufman, L. Rosenberg, S.P. Helmrich, D.R. Miller, P.D. Stolley, and S. Shapiro. 1985. Evidence for an increased risk of Crohn's disease in oral contraceptive users. *Gastroenterology* 89: 1046-49.
- Linos, A., J.W. Worthington, W.M. O'Fallon, and L.T. Kurland. 1983. Case-control study of rheumatoid arthritis and prior use of oral contraceptives. *Lancet* 1: 1299-300.
- Logan, R.F., and C.R. Kay. 1989. Oral contraception, smoking and inflammatory bowel disease-findings in the Royal College of General Practitioners Oral Contraception Study. *International Journal of Epidemiology* 18: 105-07.
- Lowe A.M., P.O. Roy, M. Poulin, P. Michel, A. Bitton, L. St Onge, and P. Brassard. 2009. Epidemiology of Crohn's disease in Quebec, Canada. *Inflammatory Bowel Disease* 15: 429-35.
- Merlino, L.A., J.R. Cerhan, L.A. Criswell, T.R. Mikuls, and K.G. Saag. 2003. Estrogen and other female reproductive risk factors are not strongly associated with the development of rheumatoid arthritis in elderly women. *Seminars in Arthritis and Rheumatism* 33: 72-82.
- Moskowitz, M.A., S.S. Jick, S. Burnside, W.J. Wallis, J.F. Dickson, J.R. Hunter, and H. Jick. 1990. The relationship of oral contraceptive use to rheumatoid arthritis. *Epidemiology* 1: 153-56.
- Ng, S.C., S. Woodrow, N. Patel, J. Subhani, and M. Harbord. 2012. Role of genetic and environmental factors in British twins with inflammatory bowel disease. *Inflammatory Bowel Disease* 18: 725-36.
- Pedersen, M., S. Jacobsen, P. Garred, H.O. Madsen, M. Klarlund, A. Svejgaard, B.V. Pedersen, J. Wohlfahrt, and M. Frisch. 2007. Strong combined gene-environment effects in anti-cyclic citrullinated peptide-positive rheumatoid arthritis: a nationwide case-control study in Denmark. *Arthritis and Rheumatism* 56: 1446-53.
- Pedersen, M., S. Jacobsen, M. Klarlund, B.V. Pedersen, A. Wiik, J. Wohlfahrt, and M. Frisch. 2006. Environmental risk factors differ between rheumatoid arthritis with and without auto-antibodies against cyclic citrullinated peptides. *Arthritis Research and Therapy* 8: R133.
- Persson, P.G., C.E. Leijonmarck, O. Bernell, G. HELLERS, and A. Ahlbom. 1993. Risk indicators for inflammatory bowel disease. *International Journal of Epidemiology* 22: 268-72.
- Pikwer, M., U. Bergström, J.A. Nilsson, L. Jacobsson, G. Berglund, C. Turesson. 2009. Breast feeding, but not use of oral contraceptives, is associated with a reduced risk of rheumatoid arthritis. *Annals of the Rheumatic Diseases* 68: 526-30.

- Pisa, F.E., M. Bovenzi, L. Romeo, A. Tonello, D. Biasi, L.M. Bambara, A. Betta, and F. Barbone. 2002. Reproductive factors and the risk of scleroderma: an Italian case-control study. *Arthritis and Rheumatism* 46: 451-56.
- Pladevall-Vila, M., G.L. Delclos, C. Varas, H. Guyer, J. Brugués-Tarradellas, and A. Anglada-Arisa. 1996. Controversy of oral contraceptives and risk of rheumatoid arthritis: meta-analysis of conflicting studies and review of conflicting meta-analyses with special emphasis on analysis of heterogeneity. *American Journal of Epidemiology* 144: 1-14.
- Pope, J.E., N. Bellamy, and A. Stevens. 1999. The lack of associations between rheumatoid arthritis and both nulliparity and infertility. *Seminars in Arthritis and Rheumatism* 28: 342-50.
- Rodríguez, L.A., L.B. Tolosa, A. Ruigómez, S. Johansson, and M.A. Wallander. 2009. Rheumatoid arthritis in UK primary care: incidence and prior morbidity. *Scandinavian Journal of Rheumatology* 38: 173-77.
- Romieu, I., M. Hernandez-Avila, and M.H. Liang. 1989. Oral contraceptives and the risk of rheumatoid arthritis: a meta-analysis of a conflicting literature. *British Journal of Rheumatology* 28 Suppl 1: 13-17; discussion 18-23.
- Sanchez-Guerrero, J., E.W. Karlson, M.H. Liang, D.J. Hunter, F.E. Speizer, and G.A. Colditz. 1997. Past use of oral contraceptives and the risk of developing systemic lupus erythematosus. *Arthritis and Rheumatism* 40: 804-08.
- Sandler, R.S., J.I. Wurzelmann, and C.M. Lyles. 1992. Oral contraceptive use and the risk of inflammatory bowel disease. *Epidemiology* 3: 374-78.
- Sicilia, B., C. López Miguel, F. Arribas, J. López Zaborras, E. Sierra, and F. Gomollón. 2001. Environmental risk factors and Crohn's disease: a population-based, case-control study in Spain. *Digestive and Liver Disease* 33: 762-67.
- Spector, T.D., E. Roman, A.J. Silman. 1990. The pill, parity, and rheumatoid arthritis. *Arthritis and Rheumatism* 33: 782-89.
- Strieder, T.G., M.F. Prummel, Tijssen, J.G., E. Endert, and W.M. Wiersinga. 2003. Risk factors for and prevalence of thyroid disorders in a cross-sectional study among healthy female relatives of patients with autoimmune thyroid disease. *Clinical Endocrinology (Oxford)* 59: 396-401.
- Strom, B.L., M.M. Reidenberg, S. West, E.S. Snyder, B. Freundlich, and P.D. Stolley. 1994. Shingles, allergies, family medical history, oral contraceptives, and other potential risk factors for systemic lupus erythematosus. *American Journal of Epidemiology* 140: 632-42.
- Thorogood, M., and P.C. Hannaford. 1998. The influence of oral contraceptives on the risk of multiple sclerosis. *British Journal of Obstetrics and Gynaecology* 105: 1296-99.
- Valikhani, M., S. Kavusi, C. Chams-Davatchi, M. Daneshpazhooh, M. Barzegari, M. Ghiasi, and R. Abedini. 2007. Pemphigus and associated environmental factors: a case-control study. *Clinical and Experimental Dermatology* 32: 256-60. Epub 2007 Mar 13.

Vandenbroucke, J.P., H.A. Valkenburg, J.W. Boersma, A. Cats, J.J. Festen, O. Huber-Bruning, and J.J. Rasker. 1982. Oral contraceptives and rheumatoid arthritis: further evidence for a preventive effect. *Lancet*, 2: 839-42.

van Zeben, D., J.M. Hazes, J.P. Vandenbroucke, B.A. Dijkmans, and A. Cats. 1990. Diminished incidence of severe rheumatoid arthritis associated with oral contraceptive use. *Arthritis and Rheumatism* 33: 1462-65.

Vcev A., Pezerovic D., Jovanovic Z., Nakic D., Vcev I., Majnarić L. 2015. A retrospective, case-control study on traditional environmental risk factors in inflammatory bowel disease in Vukovar-Srijem County, north-eastern Croatia, 2010. *Wiener Klinische Wochenschrift*. 127: 345-54.

Vessey, M., D. Jewell, A. Smith, D. Yeates, and K. McPherson. 1986. Chronic inflammatory bowel disease, cigarette smoking, and use of oral contraceptives: findings in a large cohort study of women of childbearing age. *British Medical Journal (Clinical Research Edition)* 292: 1101-13.

Vessey, M.P., L. Villard-Mackintosh, and D. Yeates. 1987. Oral contraceptives, cigarette smoking and other factors in relation to arthritis. *Contraception* 35: 457-64.

Vessey, M.P., R. Painter, and J. Powell. 2000. Skin disorders in relation to oral contraception and other factors, including age, social class, smoking and body mass index. Findings in a large cohort study. *British Journal of Dermatology* 143: 815-20.

Vestergaard, P., L. Rejnmark, J. Weeke, H.C. Hoeck, H.K. Nielsen, J. Rungby, P. Laurberg, and L. Mosekilde. 2002. Smoking as a risk factor for Graves' disease, toxic nodular goiter, and autoimmune hypothyroidism. *Thyroid* 12: 69-75.

Villard-Mackintosh, L., and M.P. Vessey. 1993. Oral contraceptives and reproductive factors in multiple sclerosis incidence. *Contraception* 47: 161-68.

Wingrave, S.J., and C.R. Kay. 1978. Reduction in incidence of rheumatoid arthritis associated with oral contraceptives. *Lancet*. 1: 569-11.

Zonana-Nacach, A., L.M. Rodríguez-Guzmán, F.J. Jiménez-Balderas, A. Camargo-Coronel, J. Escobedo-de la Peña, and A. Fraga. 2002. [Risk factors associated with systemic lupus erythematosus in a Mexican population]. *Salud Pública de México* 44: 213-18.
